# Supplementary material
Source: Springer Nature journal article supplement (https://www.springermedizin.de/resource/supplementary/13002_2010_212_MOESM4_ESM.pdf/9627456)
Supplement: MOESM4 [file 9627456]

Are you satisfied with the treatment received from sowa rigpa? (n = 75)

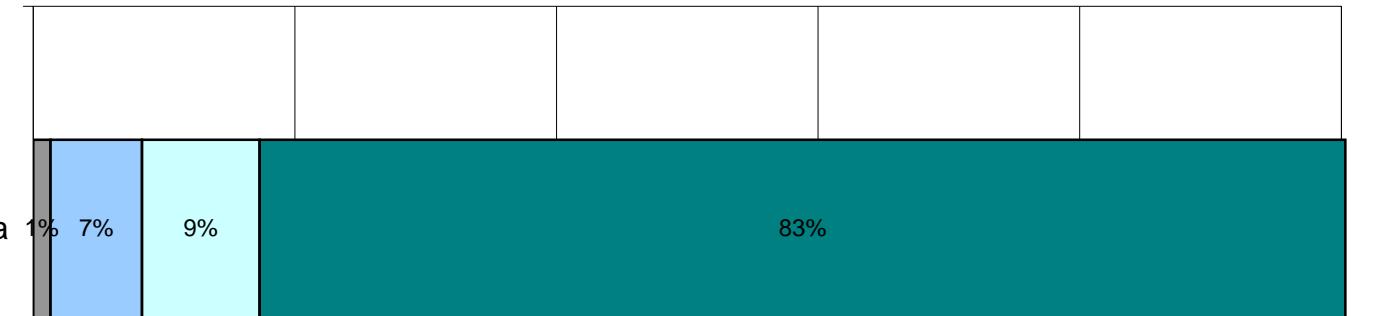

not sure

no

to some extent

yes

Can you trust and rely solely on sowa rigpa for the treatment of an illness? (n= 141)

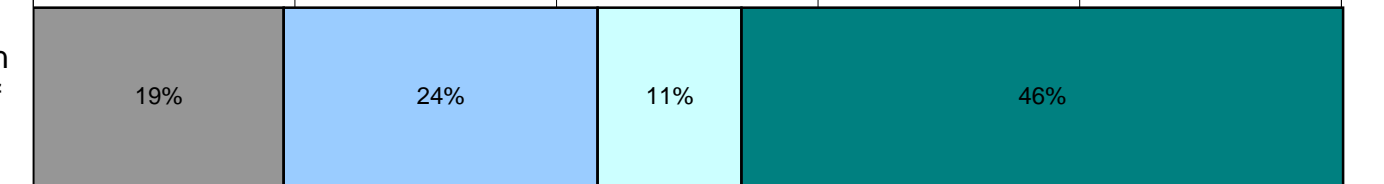

0%

20%

40%

60%

80%

100%
